# Supplementary material for: Poly(alkylidenimine) Dendrimers Functionalized with the Organometallic Moiety [Ru(η5-C5H5)(PPh3)2]+ as Promising Drugs Against Cisplatin-Resistant Cancer Cells and Human Mesenchymal Stem Cells
Source: PubMed Central journal article supplement (PMC6100097; doi:10.3390/molecules23061471), 2018-06-17
Supplement: molecules-23-01471-s001.pdf [file molecules-23-01471-s001.pdf]

1 Supplementary Material for  
 2 **Poly(alkylideneimine) dendrimers functionalized with**  
 3 **the organometallic moiety  $[\text{Ru}(\eta^5\text{-C}_5\text{H}_5)(\text{PPh}_3)_2]^+$  as**  
 4 **promising drugs against *cisplatin*-resistant cancer**  
 5 **cells and human mesenchymal stem cells**

6 Marisol Gouveia<sup>1</sup>, João Figueira<sup>2</sup>, Manuel G. Jardim<sup>1</sup>, Rita Castro<sup>1</sup>, Helena Tomás<sup>1</sup>, Kari Rissanen<sup>3</sup>  
 7 and João Rodrigues<sup>1,4\*</sup>

8 <sup>1</sup> CQM - Centro de Química da Madeira, MMRG, Universidade da Madeira, Campus da Penteada, 9000-390  
 9 Funchal, Portugal; [joaor@uma.pt](mailto:joaor@uma.pt); [marisolgouveia5@gmail.com](mailto:marisolgouveia5@gmail.com); [mgjardim@uma.pt](mailto:mgjardim@uma.pt); [ritacastro@uma.pt](mailto:ritacastro@uma.pt);  
 10 [lenat@uma.pt](mailto:lenat@uma.pt)

11 <sup>2</sup> Department of Chemistry, ScilifeLab, Umeå University, KBC - building, Linnaeus väg 6, 90736 Umeå,  
 12 Sweden; [joao.figueira@umu.se](mailto:joao.figueira@umu.se)

13 <sup>3</sup> University of Jyväskylä, Department of Chemistry, P.O. Box. 35, FI-40014 Jyväskylä, Finland;  
 14 [kari.trissanen@juu.fi](mailto:kari.trissanen@juu.fi)

15 <sup>4</sup> School of Materials Science and Engineering/Center for Nano Energy Materials, Northwestern  
 16 Polytechnical University, Xi'an, 710072, China;

17 \* Correspondence: [joaor@uma.pt](mailto:joaor@uma.pt) or [joaor@nwpu.edu.cn](mailto:joaor@nwpu.edu.cn); Tel.: +351-291-705-100

18 **Abstract:** Here and for the first time, we show that the organometallic compound  $[\text{Ru}(\eta^5\text{-C}_5\text{H}_5)(\text{PPh}_3)_2\text{Cl}]$  (RuCp) has potential to be used as a metallodrug in anticancer therapy, and further  
 19 present a new approach for the cellular delivery of the  $[\text{Ru}(\eta^5\text{-C}_5\text{H}_5)(\text{PPh}_3)_2]^+$  fragment via  
 20 coordination on the periphery of low-generation poly(alkylideneimine) dendrimers through nitrile  
 21 terminal groups. Importantly, both the RuCp and the dendrimers functionalized with  $[\text{Ru}(\eta^5\text{-C}_5\text{H}_5)(\text{PPh}_3)_2]^+$   
 22 fragments present remarkable toxicity towards a wide set of cancer cells (Caco-2,  
 23 MCF-7, CAL-72, and A2780 cells), including cisplatin-resistant human ovarian carcinoma cell lines  
 24 (A2780*cisR* cells). Also, RuCp and the prepared metallodendrimers are active against human  
 25 mesenchymal stem cells (hMSCs), which are often found in the tumor microenvironment where  
 26 they seem to play a role in tumor progression and drug resistance.  
 27

28

29 **Keywords:** dendrimers; nanocarriers; metallodrugs; ruthenium; platinum; *cisplatin*; cancer treatment; hMSCs;  
 30 toxicity, nanomedicine.

31

32 1. Spectroscopic data (NMR and MS spectra)

33 1.1. Compound  $[\{(\eta^5\text{-C}_5\text{H}_5)(\text{PPh}_3)_2\text{Ru}\}_4(1)][\text{CF}_3\text{SO}_3\text{]}_4$  (**3**)

34

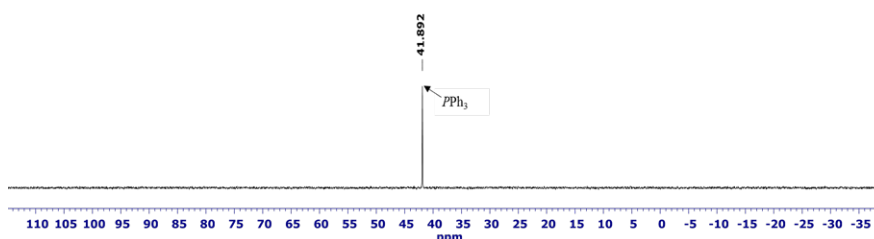

35

36

37

**Figure S1.** <sup>31</sup>P NMR spectrum of  $[\{(\eta^5\text{-C}_5\text{H}_5)(\text{PPh}_3)_2\text{Ru}\}_4(1)][\text{CF}_3\text{SO}_3\text{]}_4$  (**3**), in CDCl<sub>3</sub>.

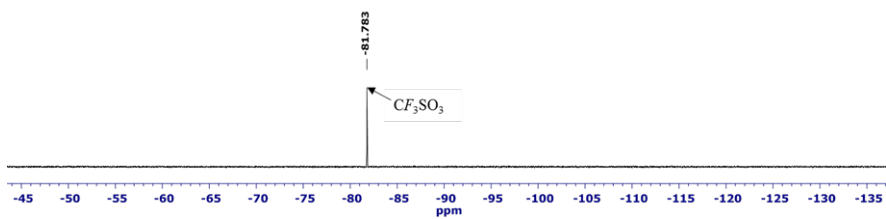

Figure S2.  $^{19}\text{F}$  NMR spectrum of  $[\{(\eta^5\text{-C}_5\text{H}_5)(\text{PPh}_3)_2\text{Ru}\}_4(\mathbf{1})][\text{CF}_3\text{SO}_3]_4 (\mathbf{3})$ , in  $\text{CDCl}_3$ .

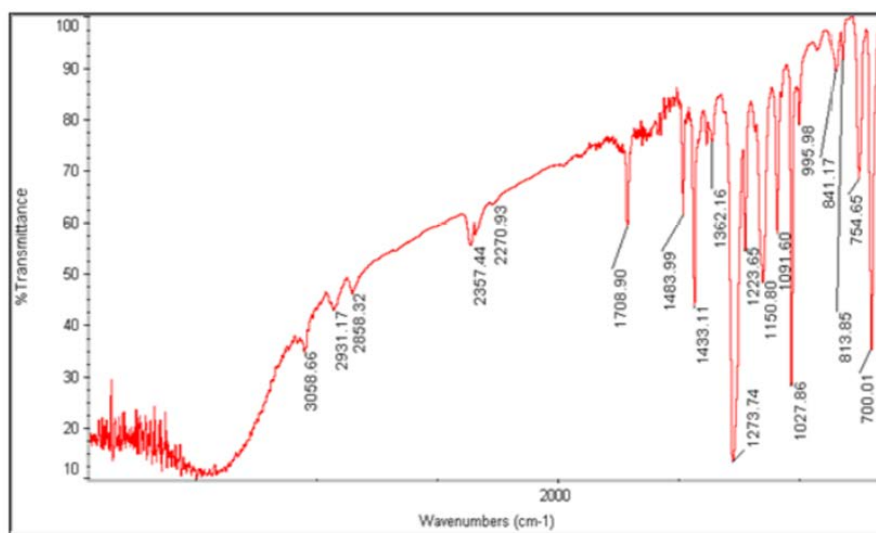

Figure S3. FTIR spectrum of  $[\{(\eta^5\text{-C}_5\text{H}_5)(\text{PPh}_3)_2\text{Ru}\}_4(\mathbf{1})][\text{CF}_3\text{SO}_3]_4 (\mathbf{3})$ , in KBr.

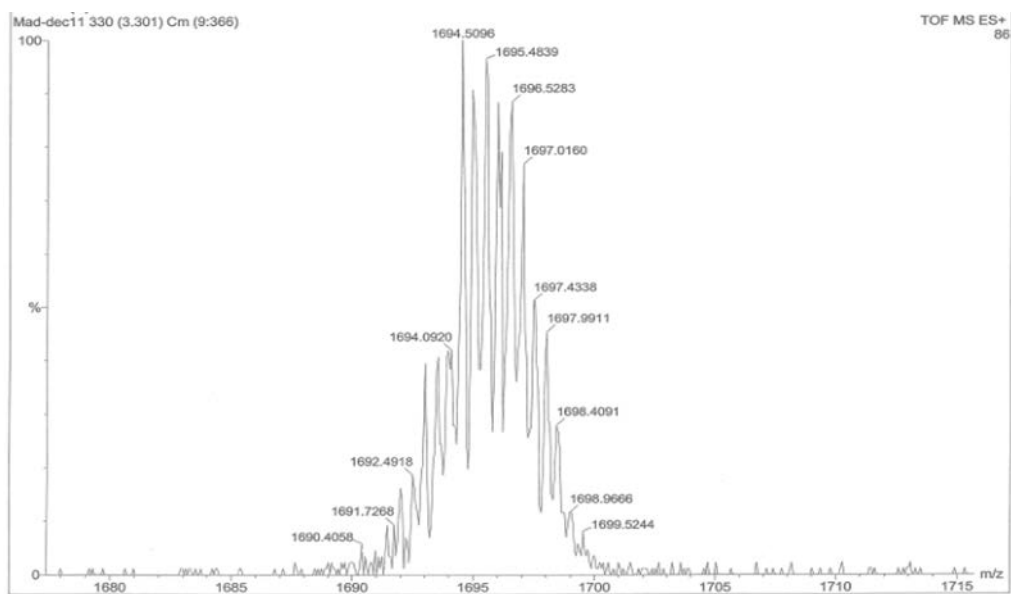

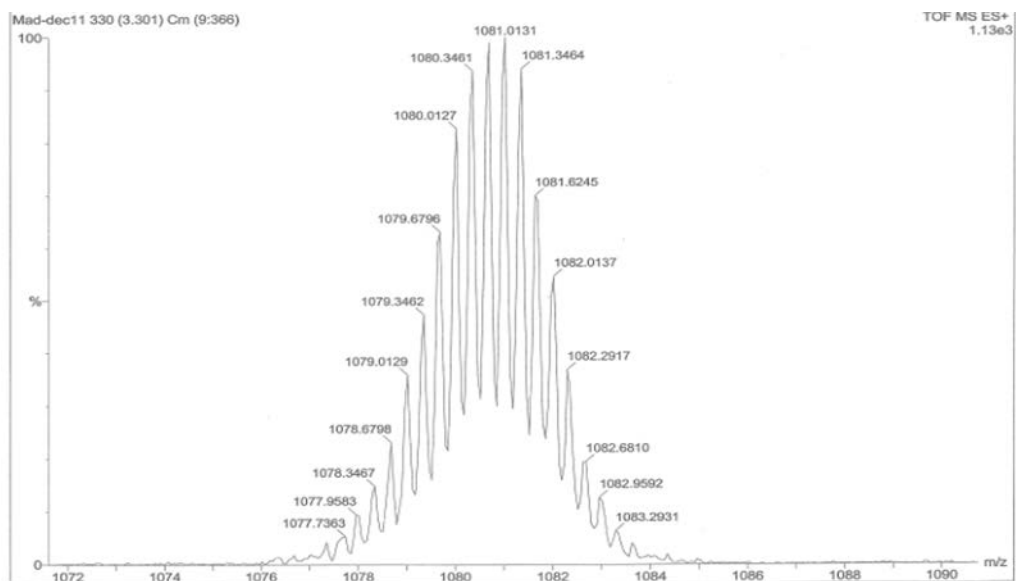

45

46

47

48

49

Figure S4. MS spectra of  $[[\{\eta^5\text{-C}_5\text{H}_5\}(\text{PPh}_3)_2\text{Ru}\}_4(\mathbf{1})][\text{CF}_3\text{SO}_3]_4 (\mathbf{3})$ .

1.2. Compound  $[[\{\eta^5\text{-C}_5\text{H}_5\}(\text{PPh}_3)_2\text{Ru}\}_4(\mathbf{2})][\text{CF}_3\text{SO}_3]_4 (\mathbf{4})$

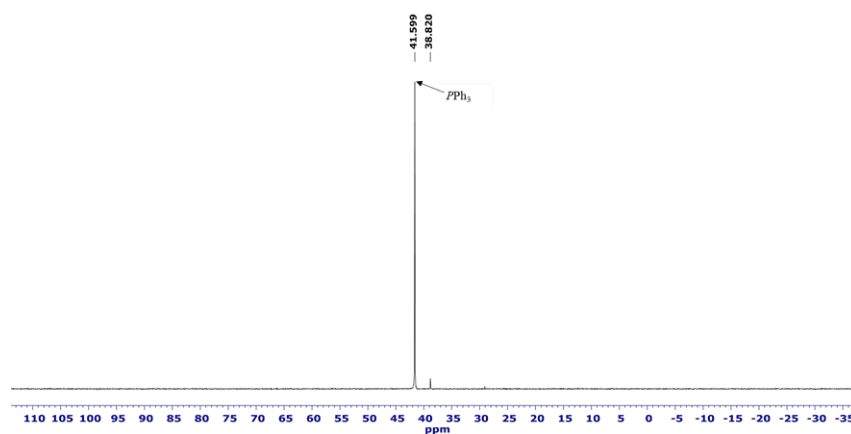

50

51

52

Figure S5.  $^{31}\text{P}$  NMR spectrum of  $[[\{\eta^5\text{-C}_5\text{H}_5\}(\text{PPh}_3)_2\text{Ru}\}_4(\mathbf{2})][\text{CF}_3\text{SO}_3]_4 (\mathbf{4})$ , in  $\text{CDCl}_3$ .

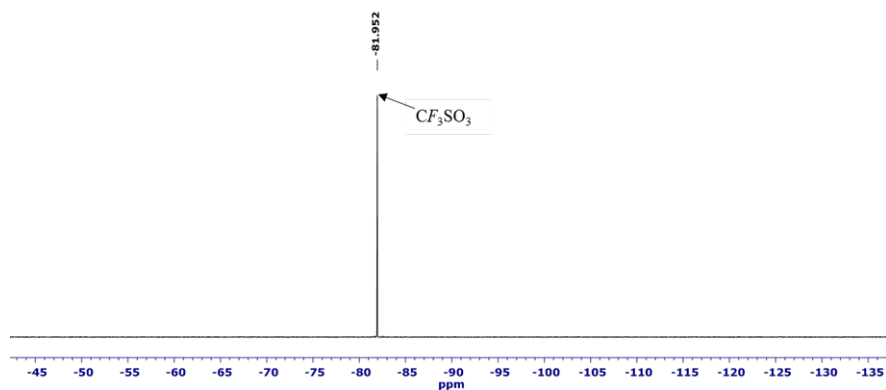

53

54

55

Figure S6.  $^{19}\text{F}$  NMR spectrum of  $[[\{\eta^5\text{-C}_5\text{H}_5\}(\text{PPh}_3)_2\text{Ru}\}_4(\mathbf{2})][\text{CF}_3\text{SO}_3]_4 (\mathbf{4})$ , in  $\text{CDCl}_3$ .

56

57

58

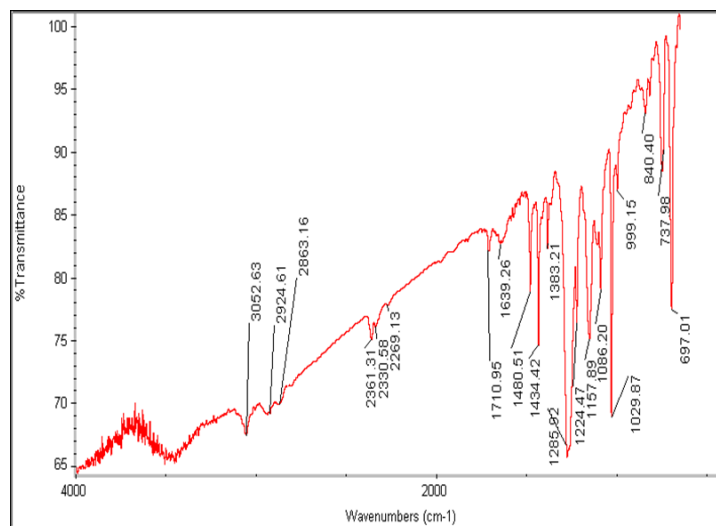

Figure S7. FTIR spectrum of  $[(\eta^5\text{-C}_5\text{H}_5)(\text{PPh}_3)_2\text{Ru}]_4(\mathbf{2})[\text{CF}_3\text{SO}_3]_4 (\mathbf{4})$ , in KBr.

59

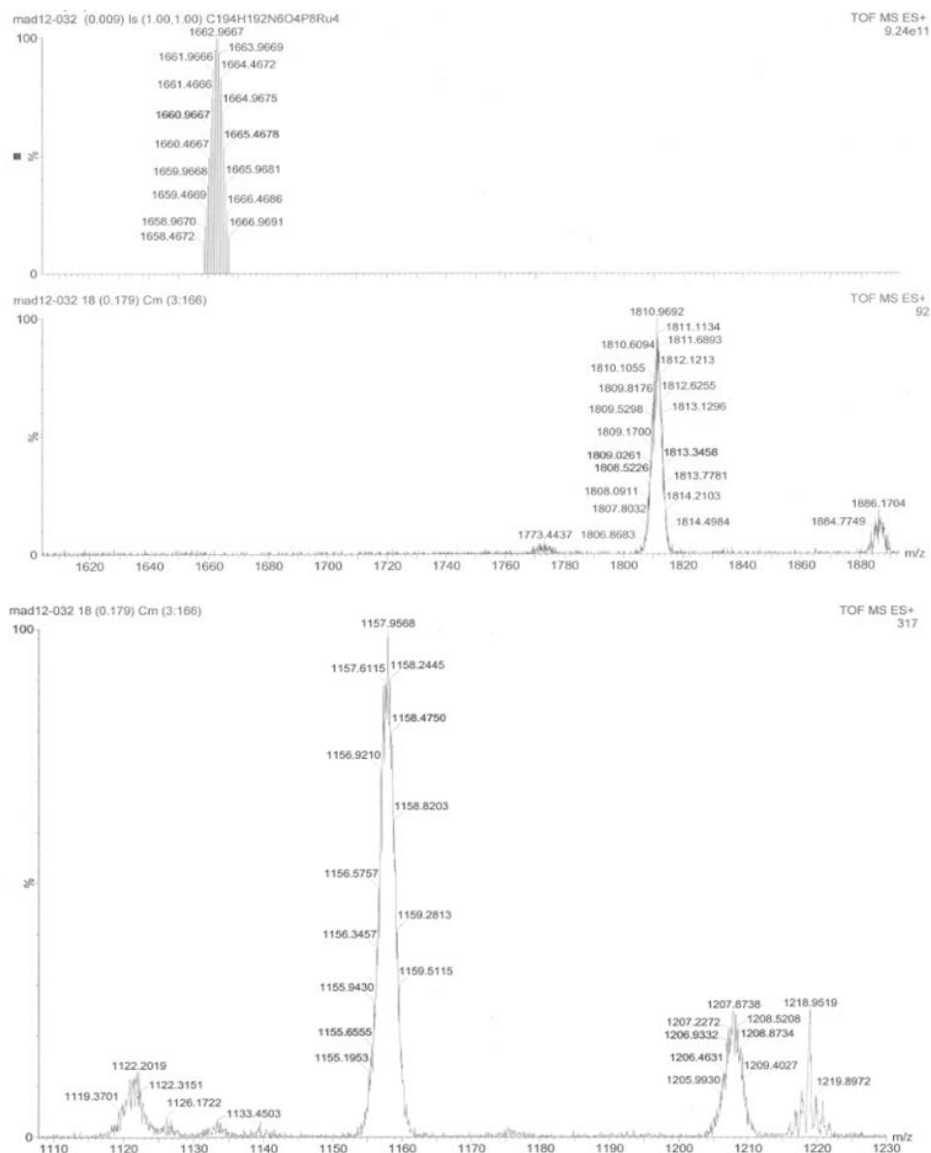

Figure S8. MS spectra of  $[(\eta^5\text{-C}_5\text{H}_5)(\text{PPh}_3)_2\text{Ru}]_4(\mathbf{2})[\text{CF}_3\text{SO}_3]_4 (\mathbf{4})$ .

60

61

62 1.3. PPh<sub>3</sub> compound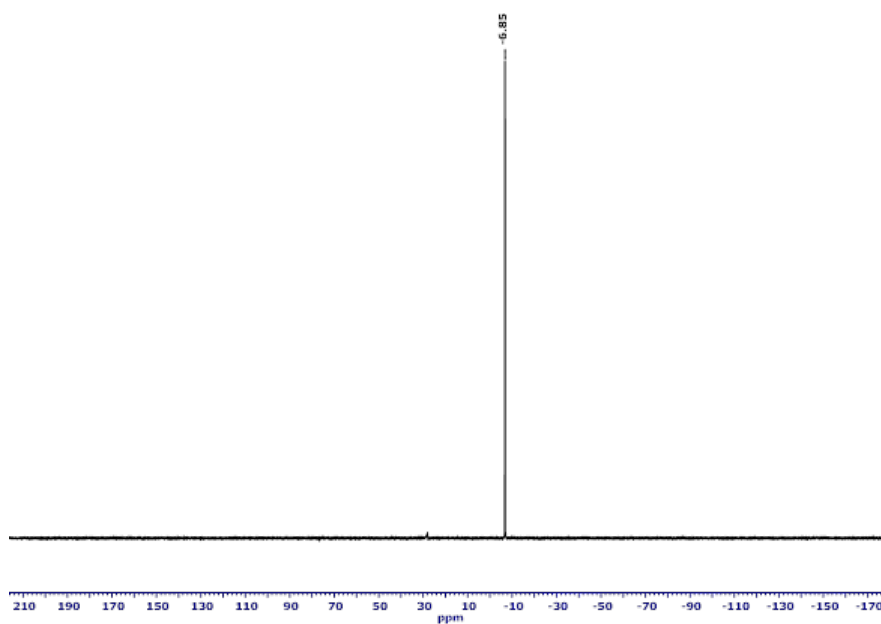

63

64

65

**Figure S9.** <sup>31</sup>P NMR spectrum of PPh<sub>3</sub> in a mixture of DMSO-*d*<sub>6</sub>/D<sub>2</sub>O.

## 66 2. Metabolic activity data

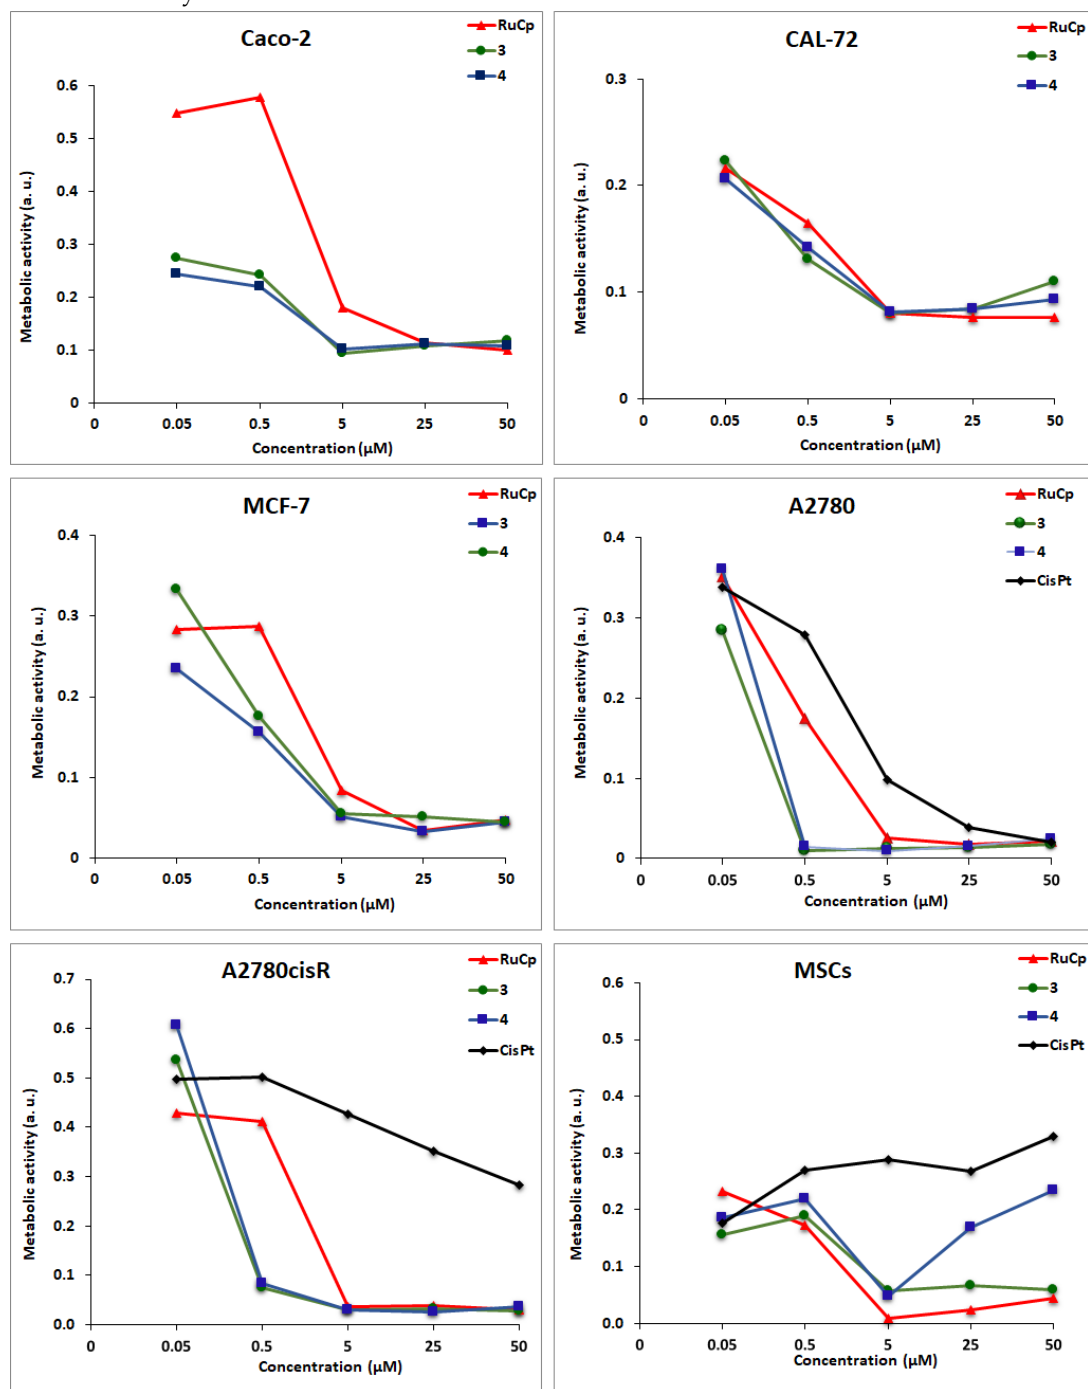

67

68 **Figure S10.** Effect of RuCp, metallodendrimers 3 and 4 and *cisPt* on the metabolic activity (an indirect measure69 of cellular viability) of Caco-2, CAL-72, MCF-7, A2780, A2780*cisR* tumor cell lines, and on hMSCs.

70

71

72

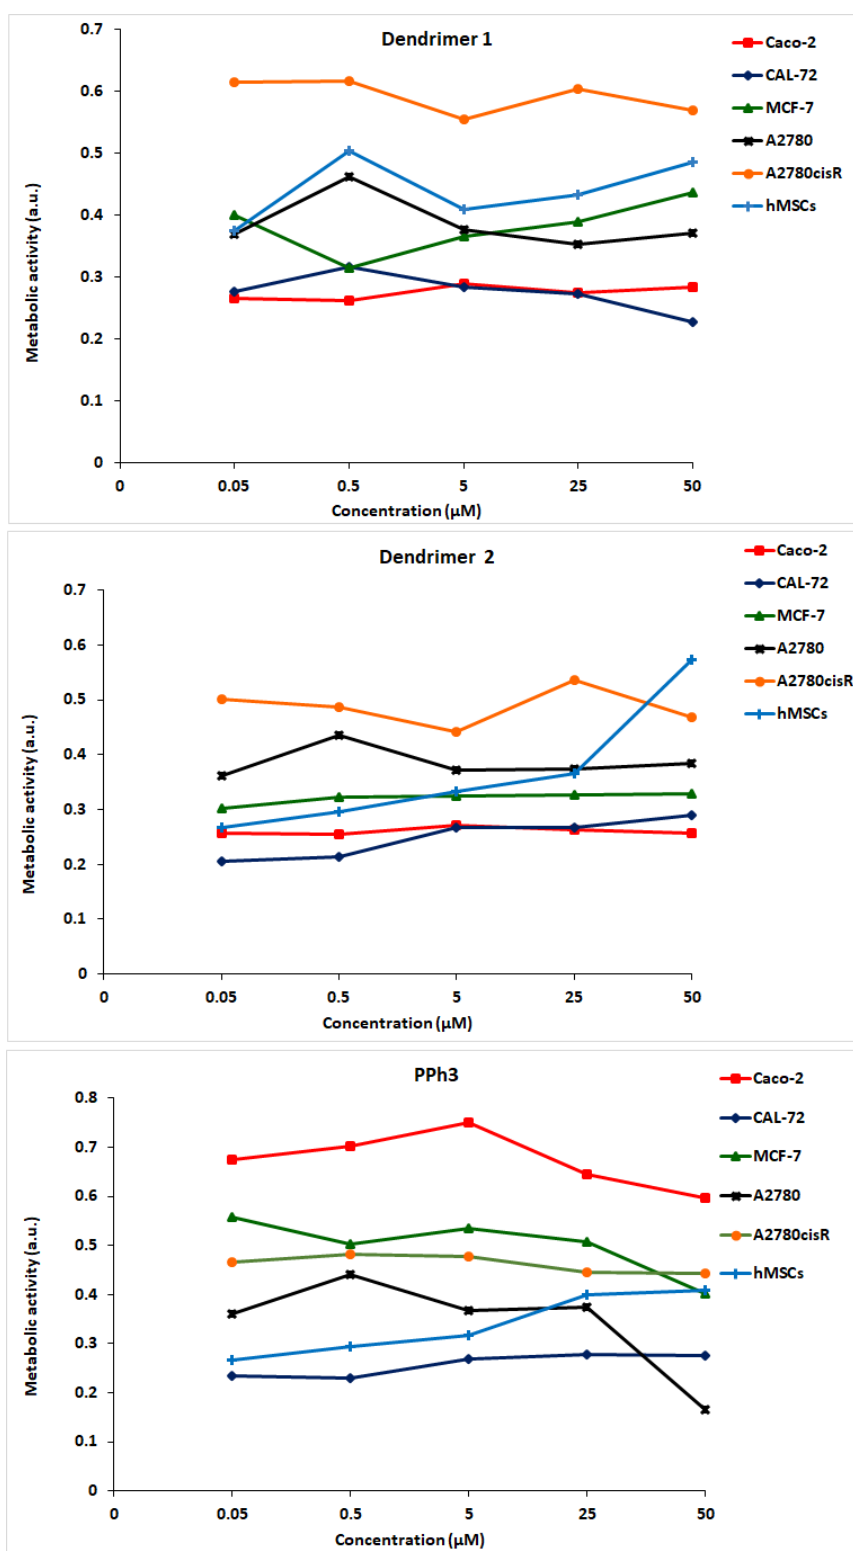

73

74 **Figure S11.** Effect of dendrimers 1 and 2 and PPh<sub>3</sub> on the metabolic activity (an indirect measure of cellular

75 viability) of Caco-2, CAL-72, MCF-7, A2780, A2780cisR and hMSC cells.

76

77
